# Supplementary material for: Controlled synthesis of shell cross-linked magnetic micelles for efficient liver MR imaging
Source: Royal Society of Chemistry journal article supplement (doi:10.1039/c2jm35308c), 2012-01-01
Supplement: c2jm35308c.pdf [file c2jm35308c.pdf]

# Supporting information for

## Controlled synthesis of shell cross-linked magnetic micelles for efficient liver MR imaging

Dechao Niu,<sup>a</sup> Zhiwen Zhang,<sup>b</sup> Shijun Jiang,<sup>b</sup> Zhi Ma,<sup>c</sup> Xiaohang Liu,<sup>d</sup> Yongsheng Li,<sup>\*a</sup> Liangping Zhou,<sup>d</sup> Changsheng Liu,<sup>a</sup> Yaping Li,<sup>\*b</sup> and Jianlin Shi<sup>\*a,e</sup>

<sup>a</sup> *School of Materials Science and Engineering, East China University of Science and Technology, Shanghai 200237, China.*

<sup>b</sup> *Center of Pharmaceutics, Shanghai Institute of Materia Medica, Chinese Academy of Sciences, Shanghai 201203, China*

<sup>c</sup> *Shanghai Institute of Organic Chemistry, Chinese Academy of Sciences, Shanghai 200032, China*

<sup>d</sup> *Department of radiology, Shanghai Cancer hospital, Fudan University, Shanghai, 200032, China*

<sup>e</sup> *State Key Laboratory of High Performance Ceramics and Superfine Microstructure, Shanghai Institute of Ceramics, Chinese Academy of Sciences, Shanghai 200050, China*

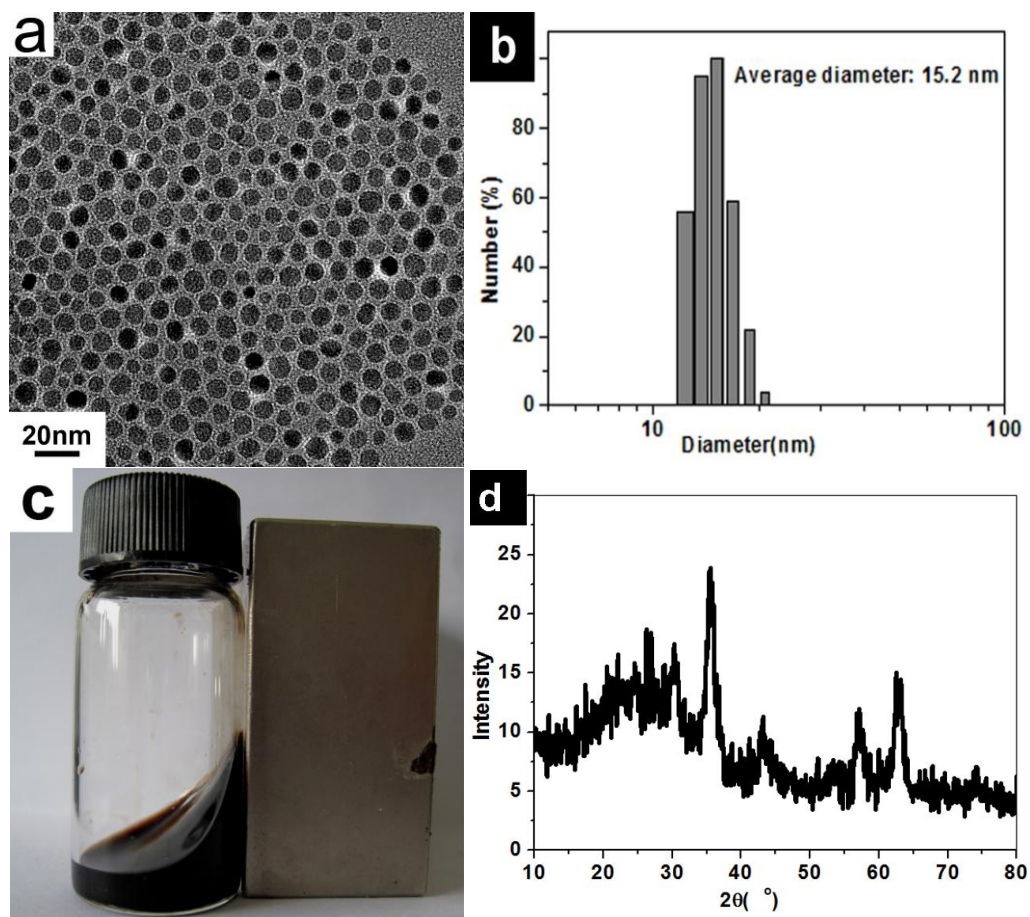

**Figure S1.** (a) TEM image and (b) particle size distribution of hydrophobic magnetite nanoparticles determined by dynamic light scattering (DLS) measurements in THF; (c) Photograph of magnetically attracted  $\text{Fe}_3\text{O}_4$  nanoparticles dispersed in THF; (d) XRD pattern of 6 nm magnetite nanoparticles.

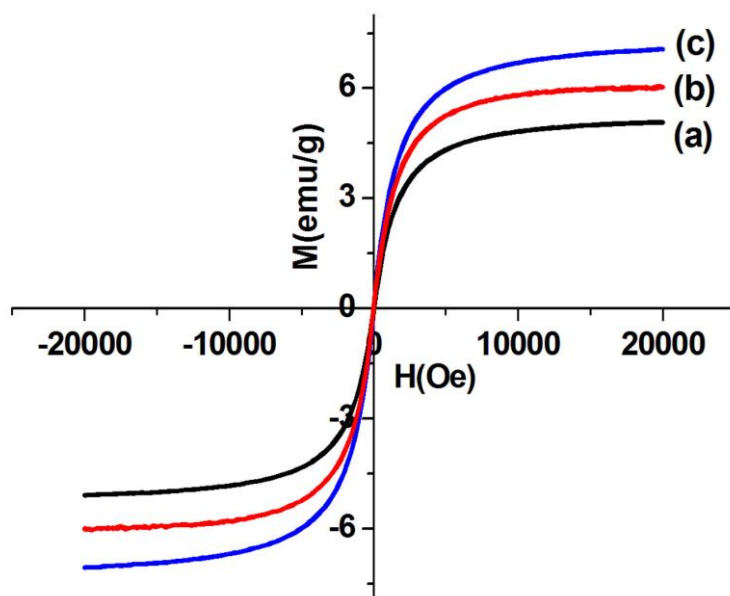

**Figure S2.** Field-dependent magnetization hysteresis loop of RhB-SCL-MMs-80 (a), RhB-SCL-MMs-130 (b) and RhB-SCL-MMs-180 (c) at 300 K.

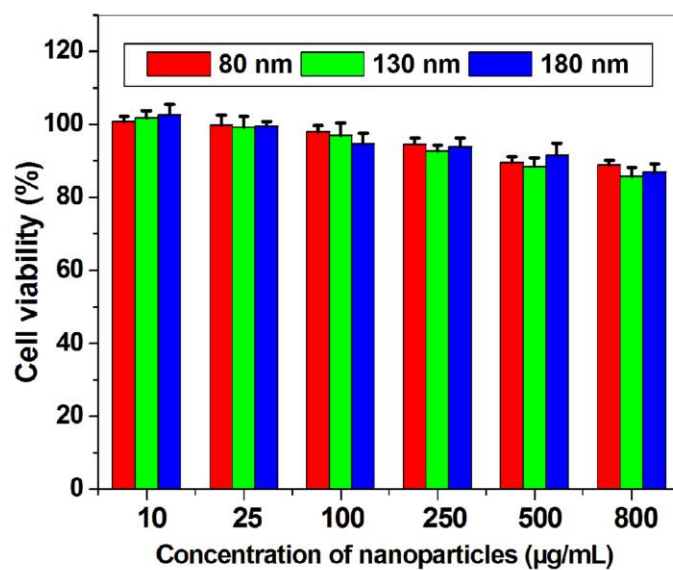

**Figure S3.** Cell viability of macrophage cell line RAW264.7 treated with various concentrations of RhB-SCL-MMs-80, RhB-SCL-MMs-130 and RhB-SCL-MMs-180 as measured by the MTT assay.

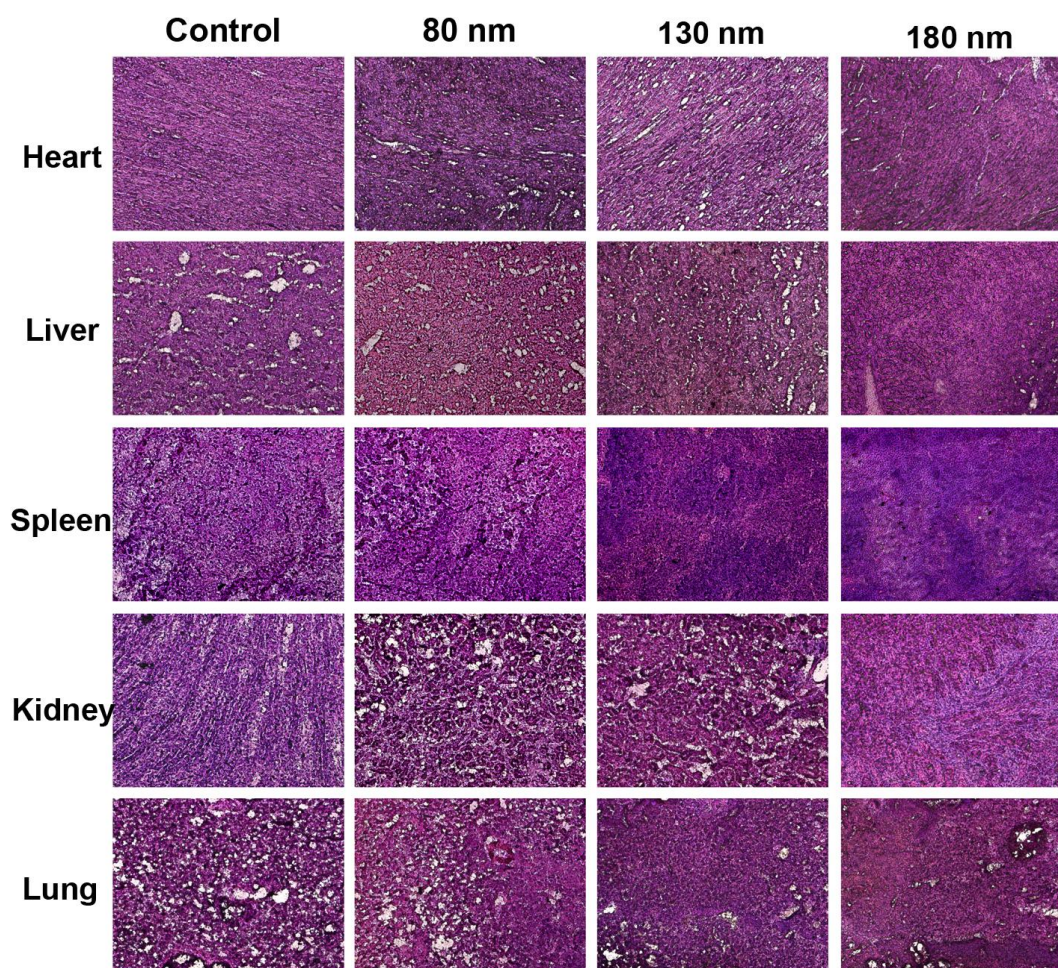

**Figure S4.** Histological analysis of heart, liver, spleen, kidney, and lung tissue from ICR mice in 24 h of injection with RhB-SCL-MMs-80, RhB-SCL-MMs-130 and RhB-SCL-MMs-180 through tail veins. Images were acquired at 100× magnification.

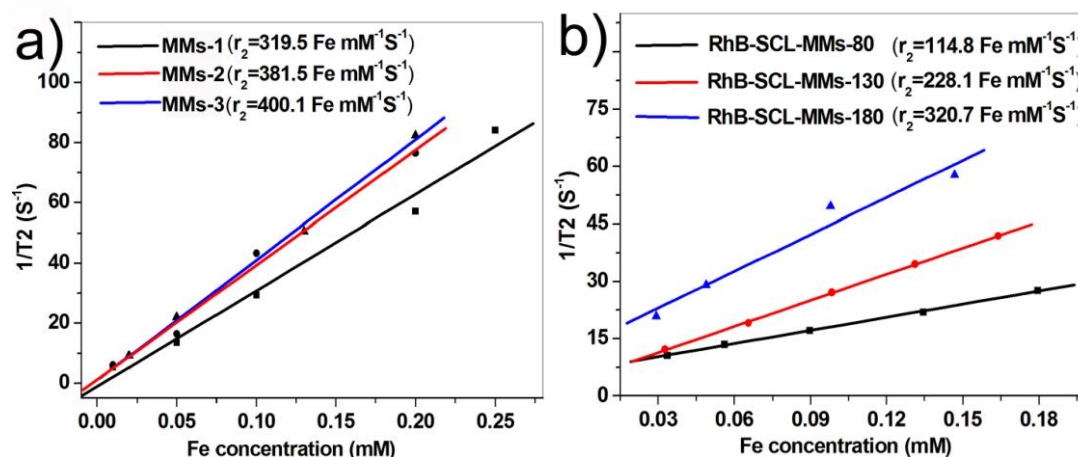

**Figure S5.**  $T_2$  relaxation rate ( $1/T_2$ ) as a function of Fe concentration for the MMs (a) and the RhB-SCL-MMs (b) at 3.0 T, respectively. The slope indicates the specific relaxivity value,  $r_2$ .

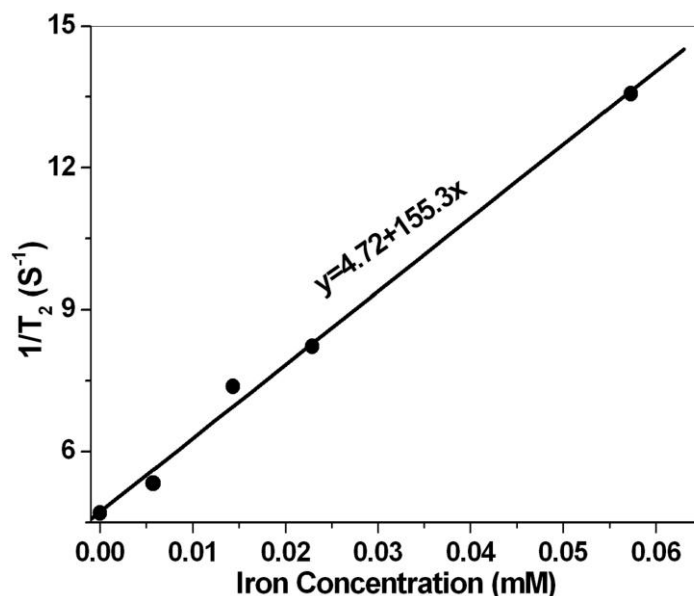

**Figure S6.**  $T_2$  relaxation rate ( $1/T_2$ ) as a function of Fe concentration for the DMSA-coated  $\text{Fe}_3\text{O}_4$  containing single magnetite nanoparticles at 3.0 T, which were synthesized based on the reported method [ref 11 in the text]. Y. M. Huh, Y. W. Jun, H. T. Song, S. Kim, J. S. Choi, J. H. Lee, S. Yoon, K. S. Kim, J. S. Shin, J. S. Suh, J. Cheon, *J. Am. Chem. Soc.* **2005**, 127, 12387.

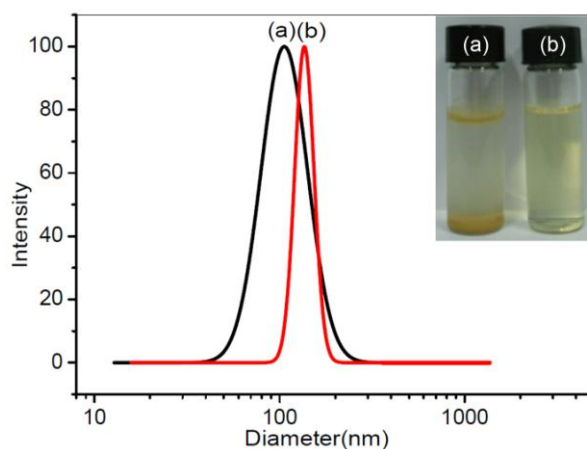

**Figure S7.** Hydrodynamic diameters of SCL-MMs in water (a) and PEGylated SCL-MMs in PBS (b) determined by DLS. The inset is digital photograph of samples dispersed in PBS. The results show that the diameter of SCL-MMs increased from 110.7 to 137.2 nm after PEGylation, indicating the successful grafting of PEG molecules on the surface of SCL-MMs. Besides, the PEGylated SCL-MMs displays well stability in PBS, while the SCL-MMs without PEG precipitated quickly in PBS solution. This phenomenon further confirmed the important role of PEG in biomedical applications.
